# Supplementary material
Source: PubMed Central journal article supplement (PMC2652260)
Supplement: M808071200_1.pdf [file M808071200_1.pdf]

Supplementary Table 1. Disk sensitivity assay results

| Reagents                          | Wild type 43504 | 43504-HP310:Kan |
|-----------------------------------|-----------------|-----------------|
| 500 mM Benzyl Viologen            | 17.8 ± 0.5      | 18.5 ± 0.9      |
| 10 mg/ml Gentian Violet           | 7.6 ± 0.8       | 7.6 ± 0.4       |
| 11 mg/ml Crystal Violet           | 8.1 ± 0.9       | 9 ± 0.5         |
| 100% Triton 100                   | 13.8 ± 0.4      | 15.2 ± 0.6      |
| 100% Tween 20                     | 6.5 ± 0.2       | 6.6 ± 0.7       |
| 100% SDS                          | 3.5 ± 0.9       | 3.6 ± 0.5       |
| 20 mM paraquat                    | 17.5 ± 0.8      | 21 ± 0.5        |
| 30 mM paraquat                    | 21 ± 0.5        | 26 ± 0.9        |
| 10% <i>t</i> -butyl hydroperoxide | 17 ± 1.1        | 25 ± 0.9        |
| 20% <i>t</i> -butyl hydroperoxide | 25 ± 0.5        | 30 ± 0.7        |
| 20% cumene hydroperoxide          | 15 ± 0.2        | 18 ± 0.8        |
| 50% cumene hydroperoxide          | 21 ± 0.9        | 26 ± 0.7        |

Zones of inhibition were measured in millimeters from the edge of the filter paper disk to the edge of the clear zone around the disk. Each disk was saturated with 10 µl of the indicated reagent. Results are the averages of five independent experiments with standard deviations.
